# Supplementary material for: PAMAM–guanylthiourea conjugates mask furin's substrate binding site: mechanistic insights from molecular docking and molecular dynamics studies assist the design of potential furin inhibitors
Source: Royal Society of Chemistry journal article supplement (doi:10.1039/d3nj00703k), 2023-01-01
Supplement: d3nj00703k1.pdf [file d3nj00703k1.pdf]

## Supporting Information

PAMAM-guanylthiourea conjugates mask furin's substrate binding site: Mechanistic insights from molecular docking and molecular dynamics studies assist the design of potential furin inhibitors

*Chithra R Nair and K.G. Sreejalekshmi\**

Department of Chemistry, Indian Institute of Space Science and Technology, Valiamala Post,  
Thiruvananthapuram, India – 695 547

\*) Corresponding author: [sreeja@iist.ac.in](mailto:sreeja@iist.ac.in)

## Contents of Supporting Information

|                                                                                                         |       |
|---------------------------------------------------------------------------------------------------------|-------|
| <b>Figure S1:</b> PAMAM GTU library .....                                                               | 3-5   |
| <b>Figure S2:</b> 2D interaction diagram of PAMAM G0, 2, 3, 4 and 5 with furin.....                     | 6     |
| <b>Figure S3:</b> 2D summary of interaction analysis results of PAMAM G0, 2, 3, 4 and 5 with furin..... | 7     |
| <b>Figure S4:</b> Protein-ligand RMSD plot of PAMAM G0, 1, 2, 3, 4 and 5 in contact with furin.....     | 8     |
| <b>Figure S5:</b> Interaction fraction summary of PAMAM G0, 2, 3, 4 and 5 in contact with furin.....    | 9     |
| <b>Figure S6 &amp; S7:</b> <sup>1</sup> H and <sup>13</sup> C NMR spectra of 1 .....                    | 10    |
| <b>Figure S8, S9 &amp; S10:</b> <sup>1</sup> H, <sup>13</sup> C and DEPT-135 NMR spectra of 2 .....     | 11-12 |
| <b>Figure S11-S15:</b> ESI-MS spectra .....                                                             | 12-14 |

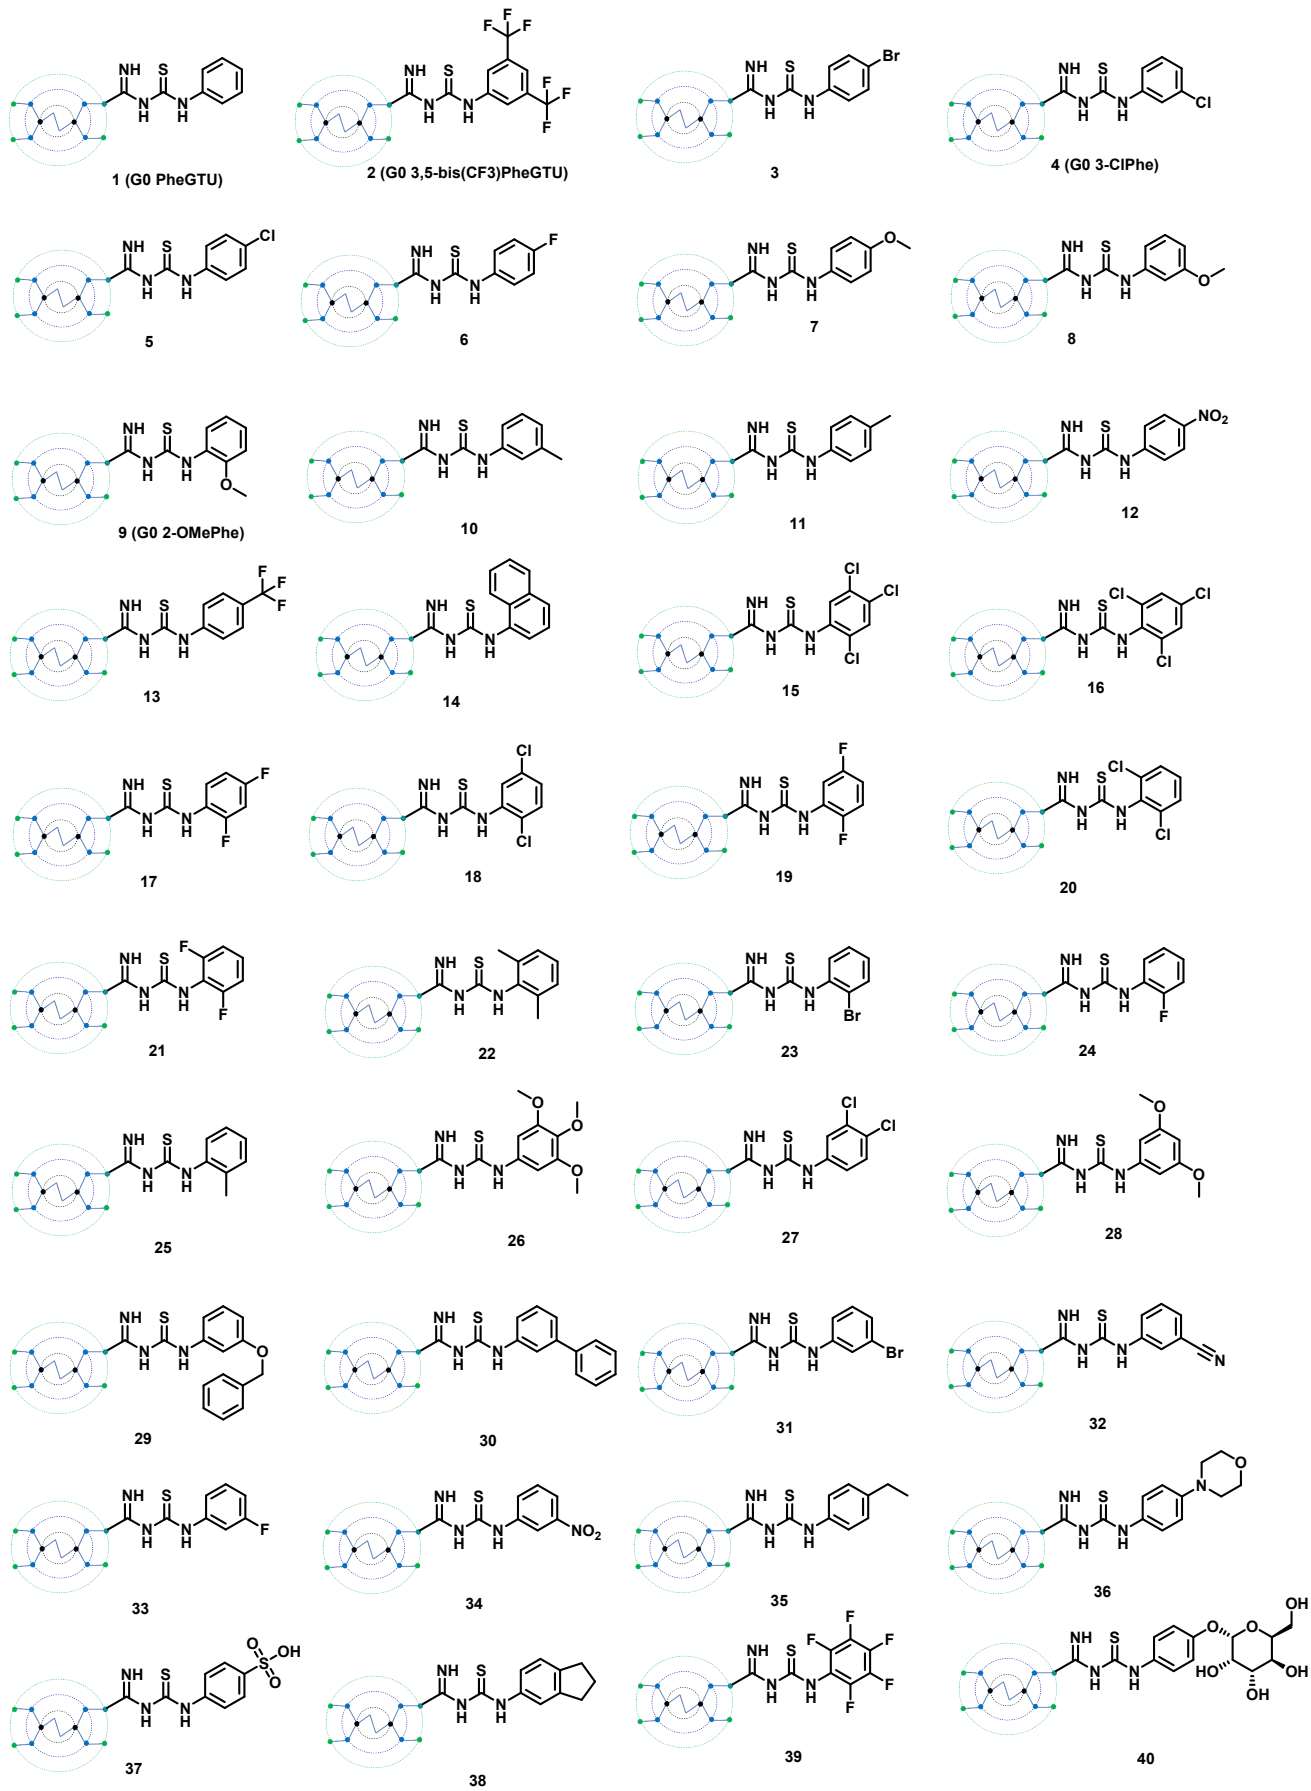

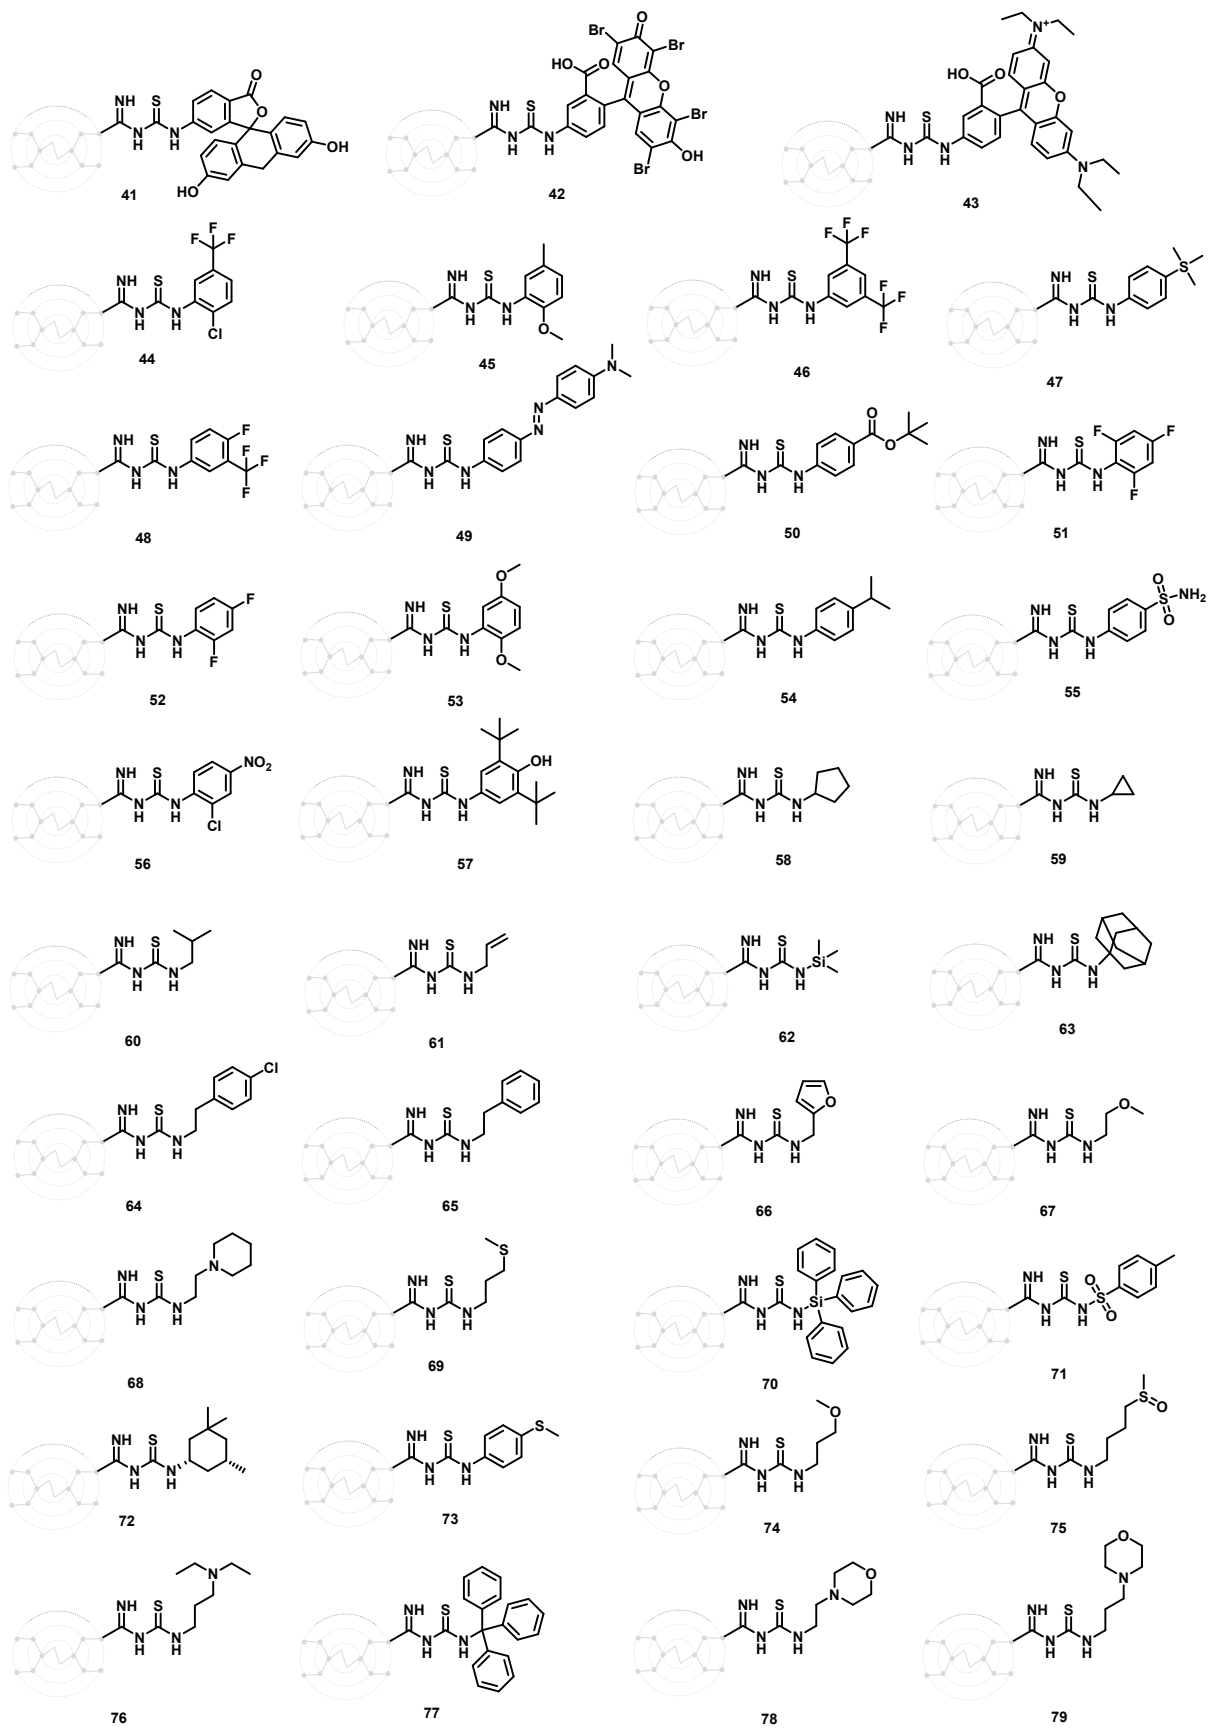

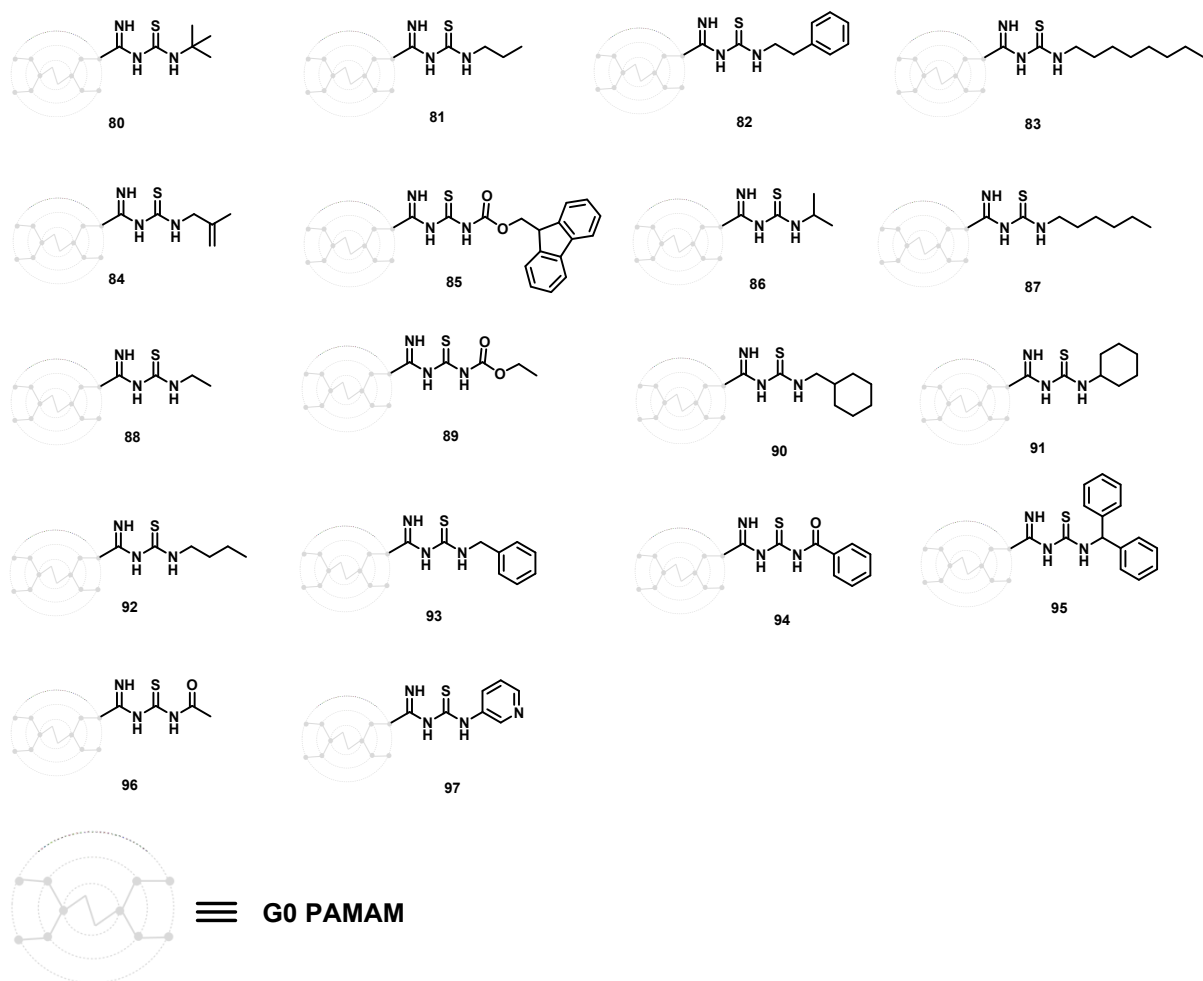

**Figure S1:** Designed PAMAM GTU library

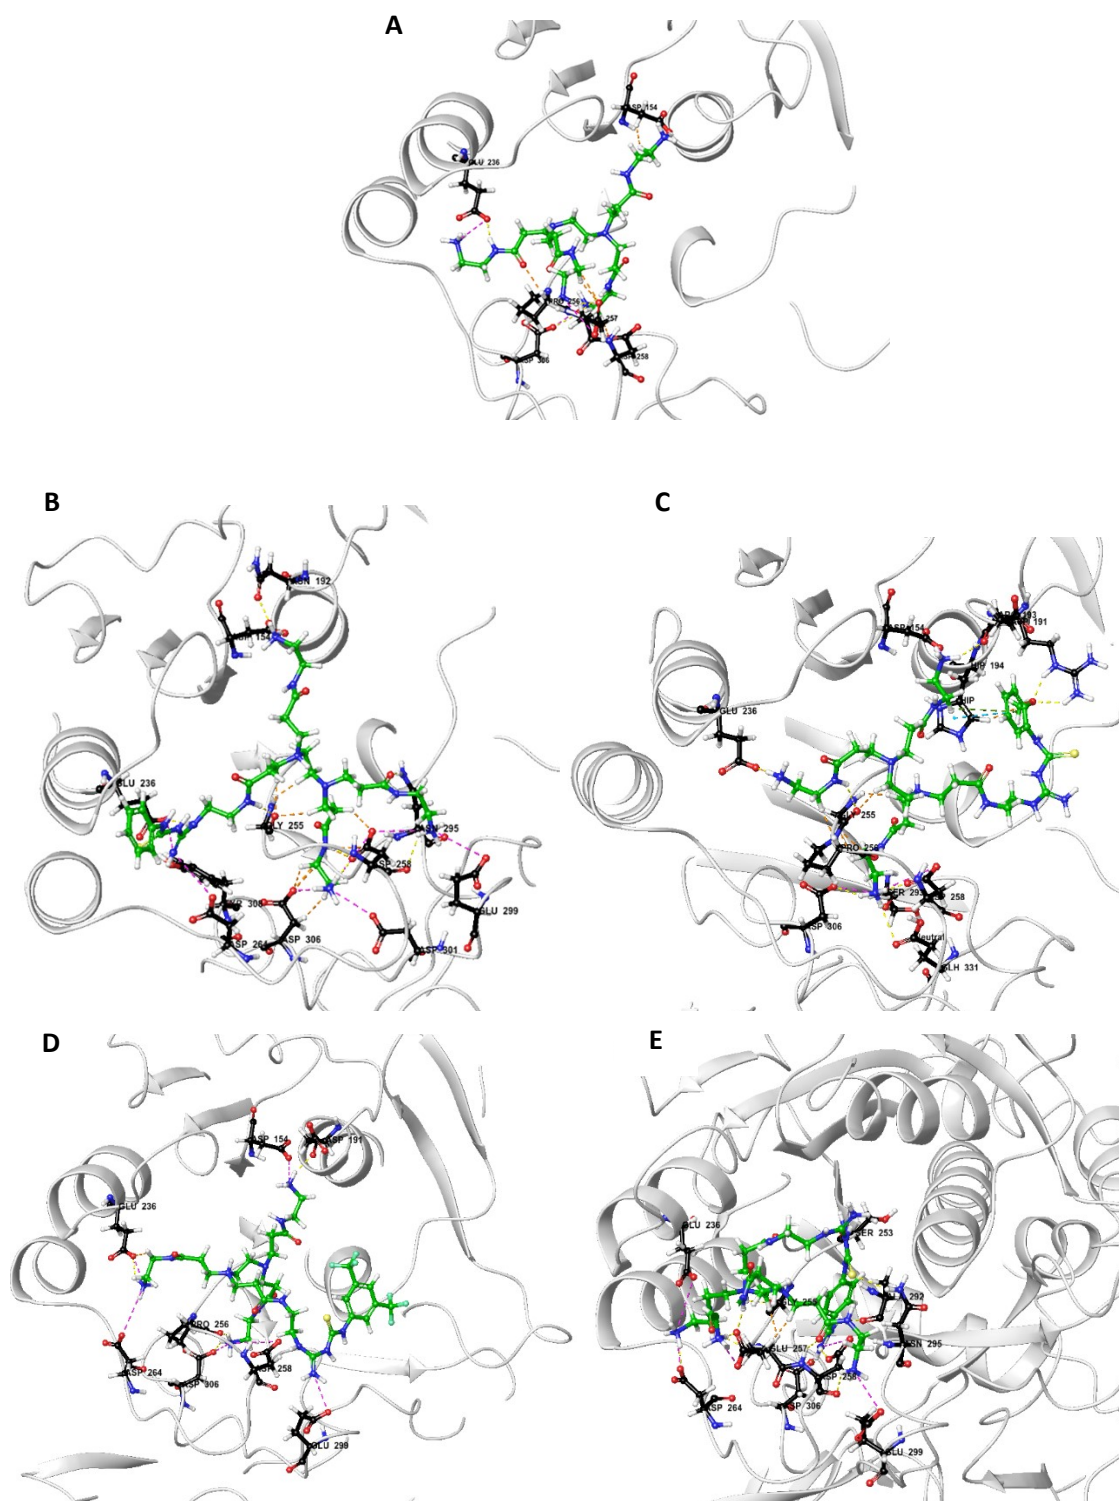

**Figure S2.** 3D depiction of interaction of (A) G0 PAMAM with Asp154, Glu236, Pro256, Glu257, Asp258, Asp306 (B) 2 with Asp154, Asn192, Glu236, Gly255, Asp258, Asp264, Glu299, Asp301, Asp306, Tyr308 (C) 3 with Asp154, Asp191, Arg193, His194, Val231, Glu236, Gly255, Pro256, Asp258, Ser293, Asp306, Glu331 (D) 4 with Asp154, Asp191, Glu236, Pro256, Asp258, Asp264, Glu299, Asp306 (E) 5 with Glu236, Asp264, Asp258, Gly255, Glu257, Ala292, Asn295, Glu299, Asp306 residues of furin

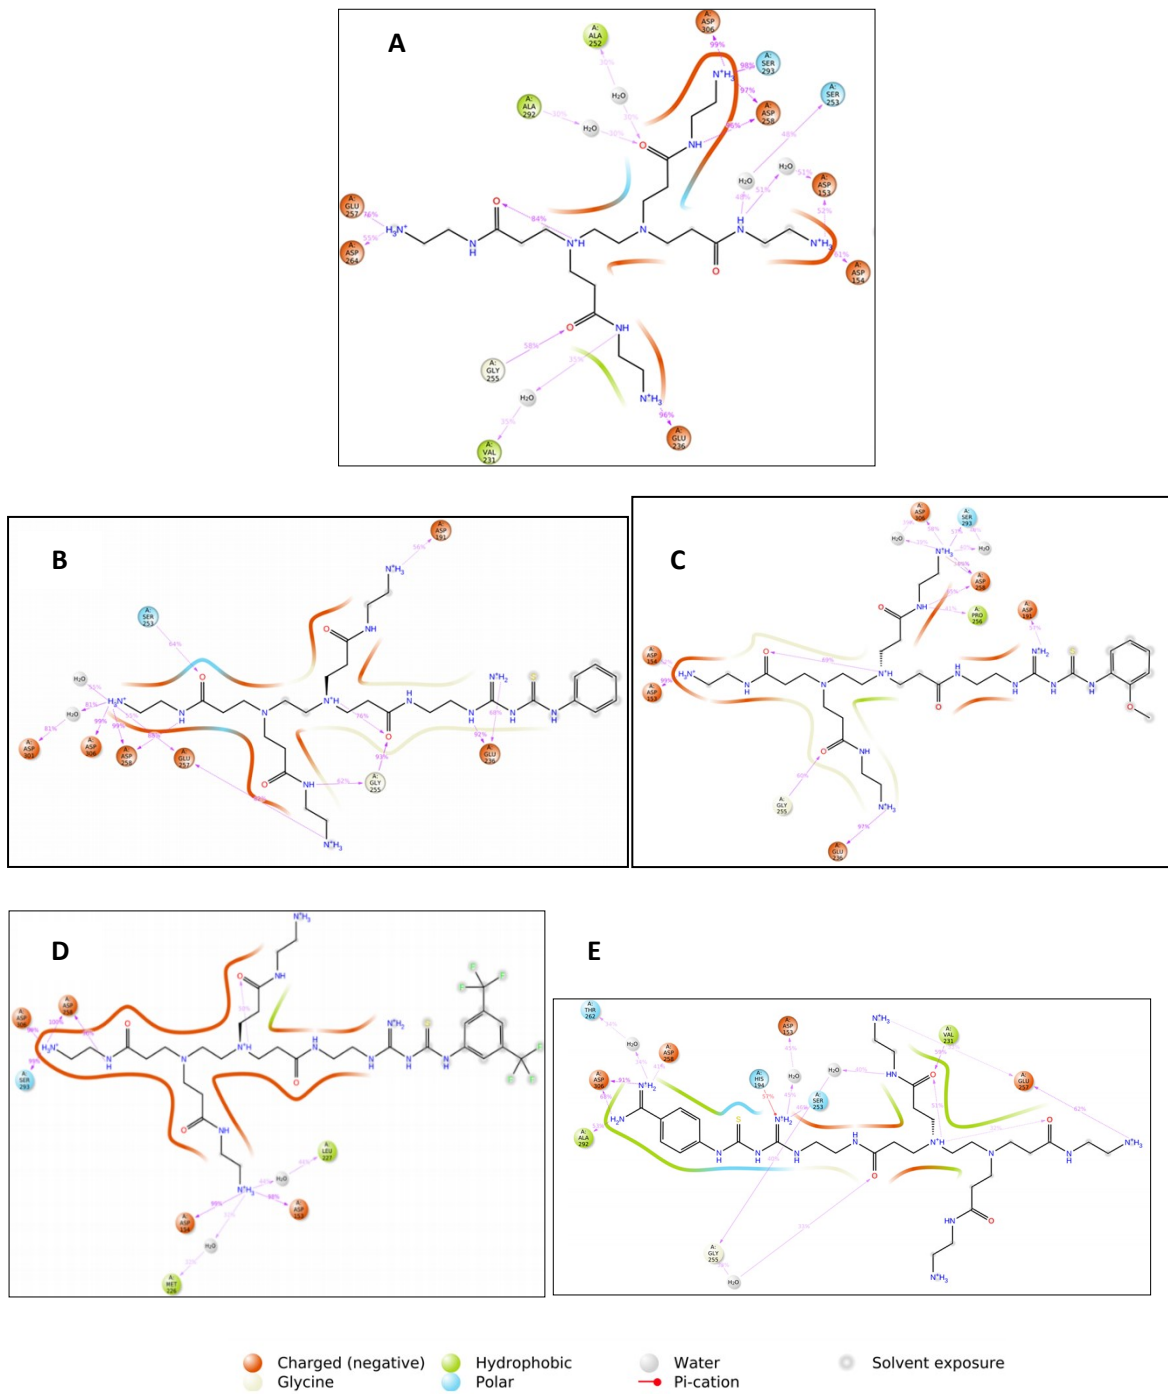

**Figure S3.** 2D summary of interaction analysis results of (A) G0 PAMAM (B) 2 (C) 3 (D) 4 (E) 5 with furin

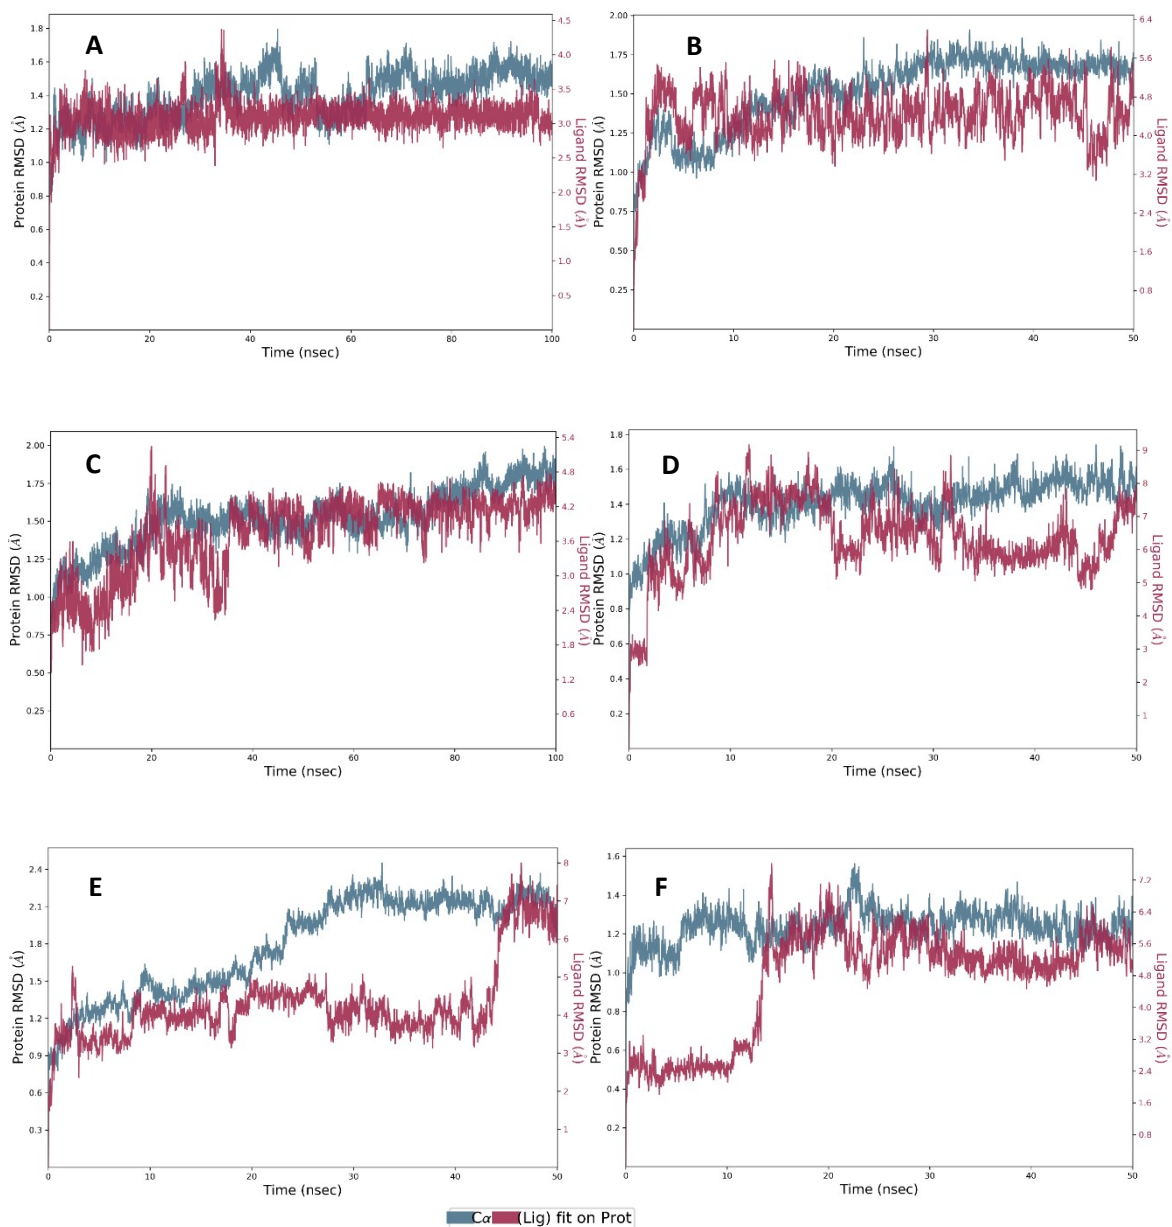

**Figure S4: Protein-ligand RMSD plot of furin (A) G0 PAMAM (B) 1 (C) 2 (D) 3 (E) 4 (F) 5 in complex with furin.**





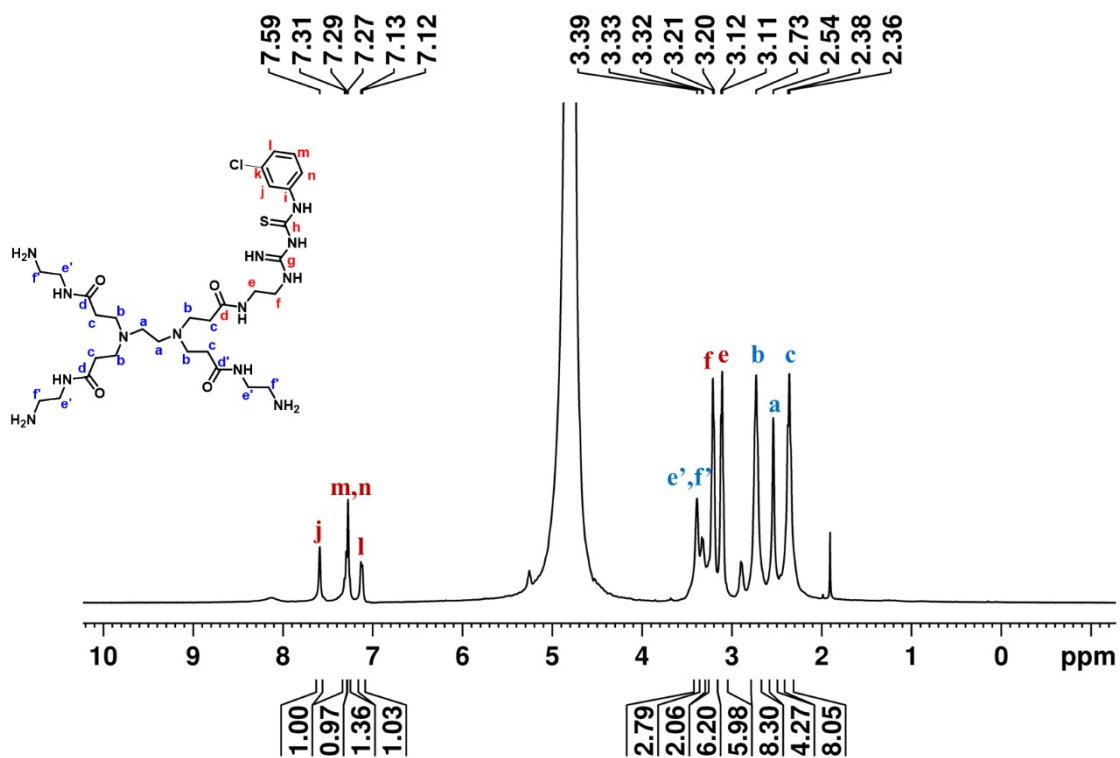

Figure S6:  $^1\text{H}$  NMR (400 MHz, Deuterium Oxide) of 1

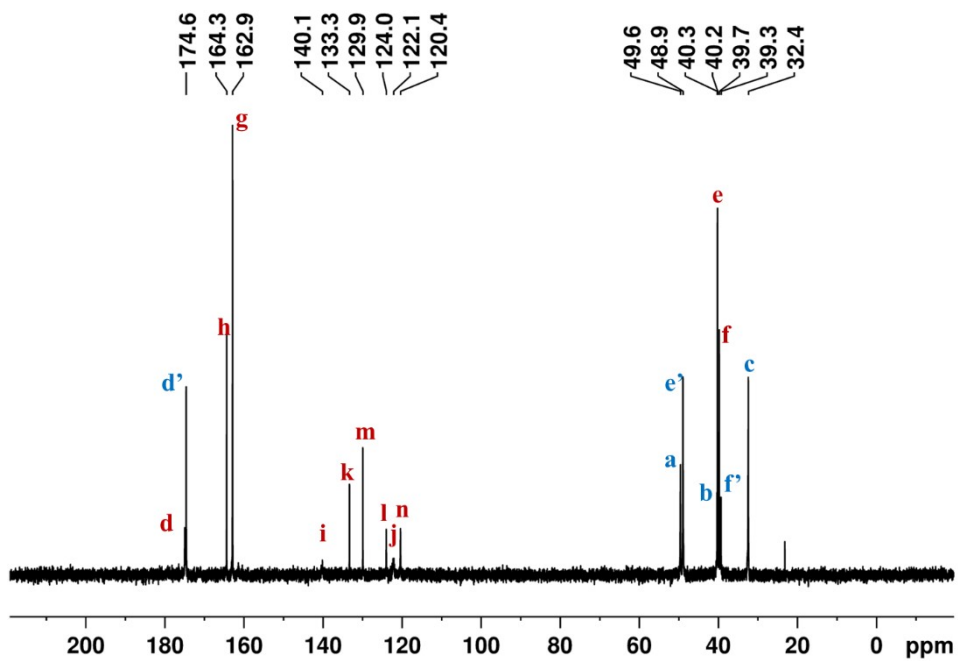

Figure S7:  $^{13}\text{C}$  NMR (100 MHz, Deuterium Oxide) of 1

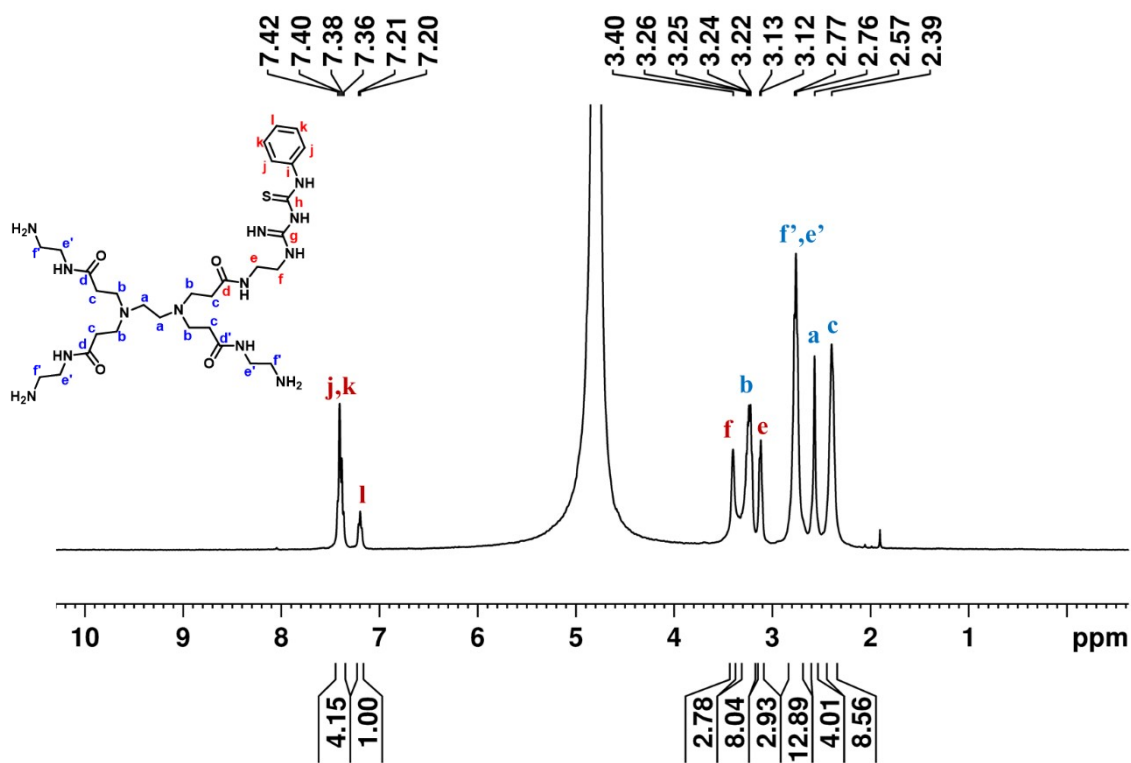

Figure S8:  $^1\text{H}$  NMR (400 MHz, Deuterium Oxide) of 2

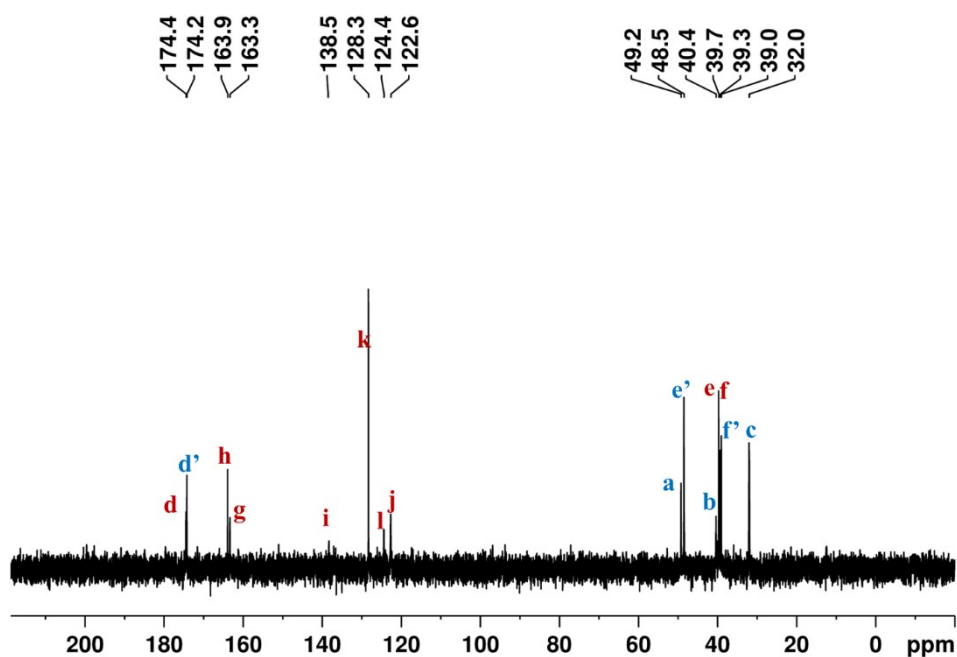

Figure S9:  $^{13}\text{C}$  NMR (100 MHz, Deuterium Oxide) of 2

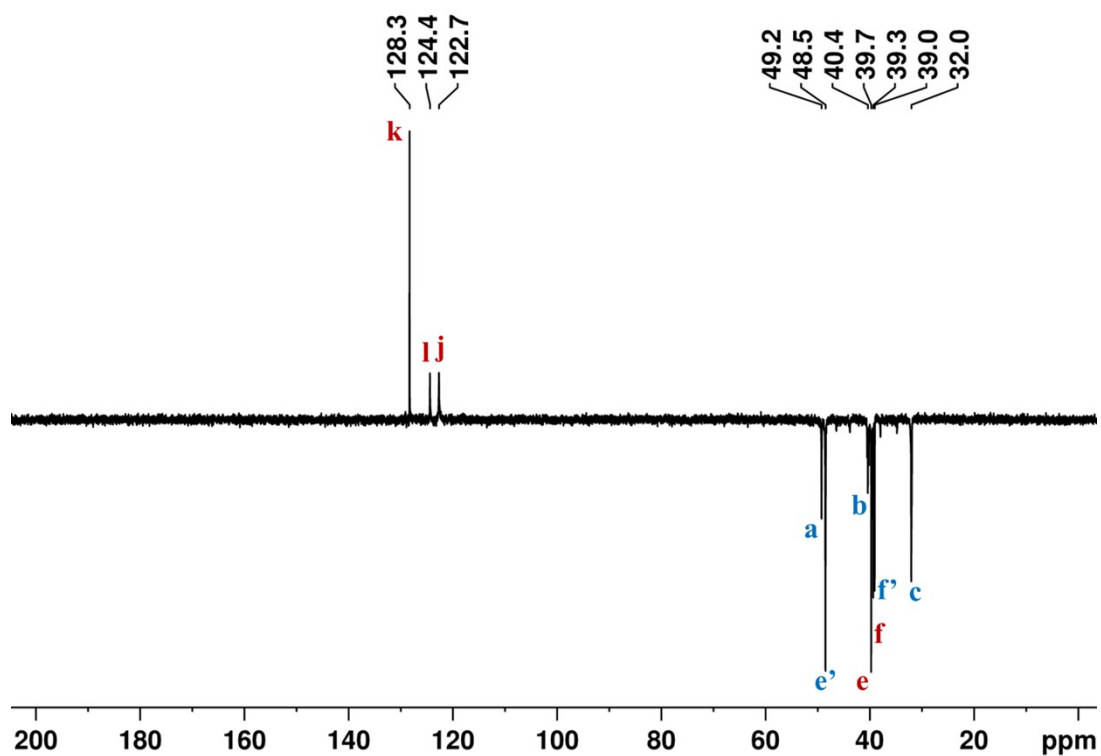

Figure S10: DEPT-135 NMR of 2 (in D<sub>2</sub>O)

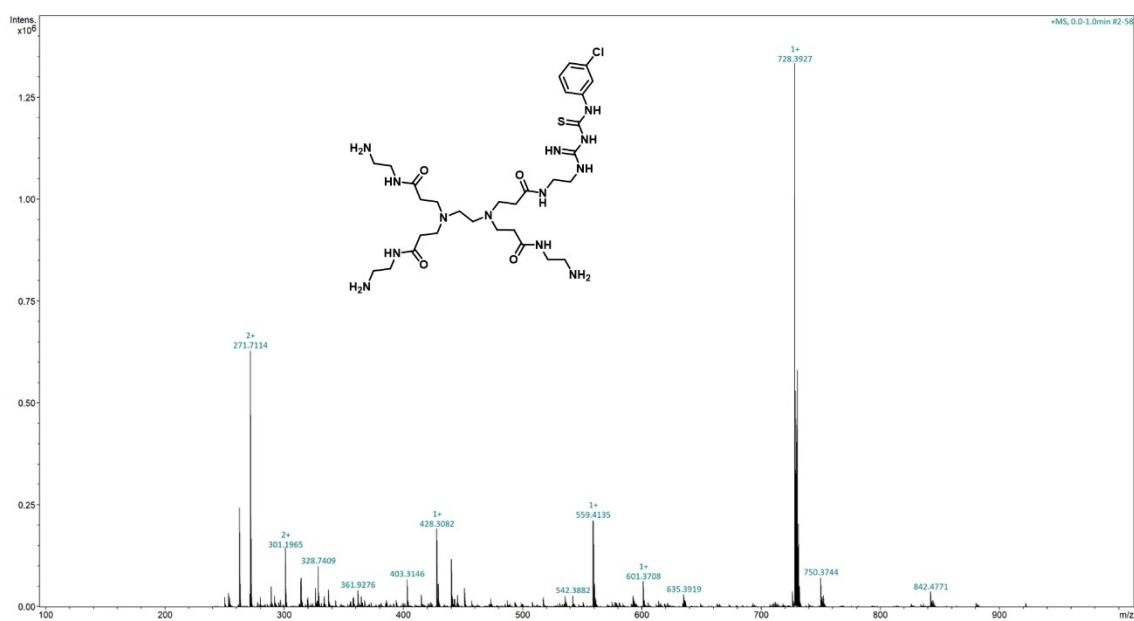

Figure S11: ESI-MS Spectrum of 1 calcd mass (M+H)<sup>+</sup>, 728.3904; found, 728.3927

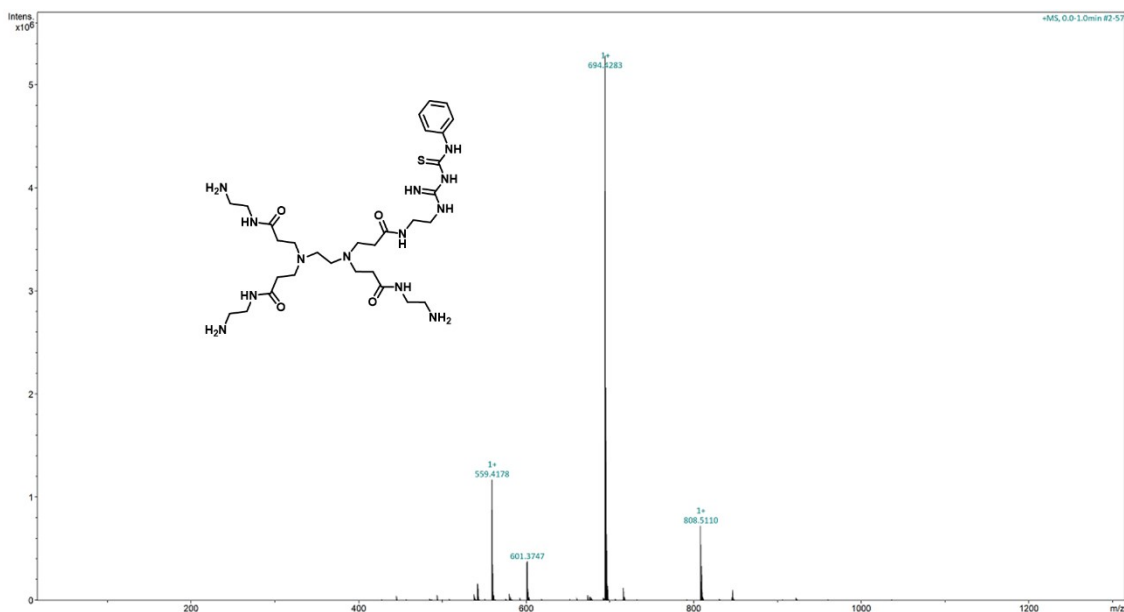

Figure S12: ESI-MS Spectrum of 2 calcd mass  $(M+H)^+$ , 694.4293; found, 694.4283

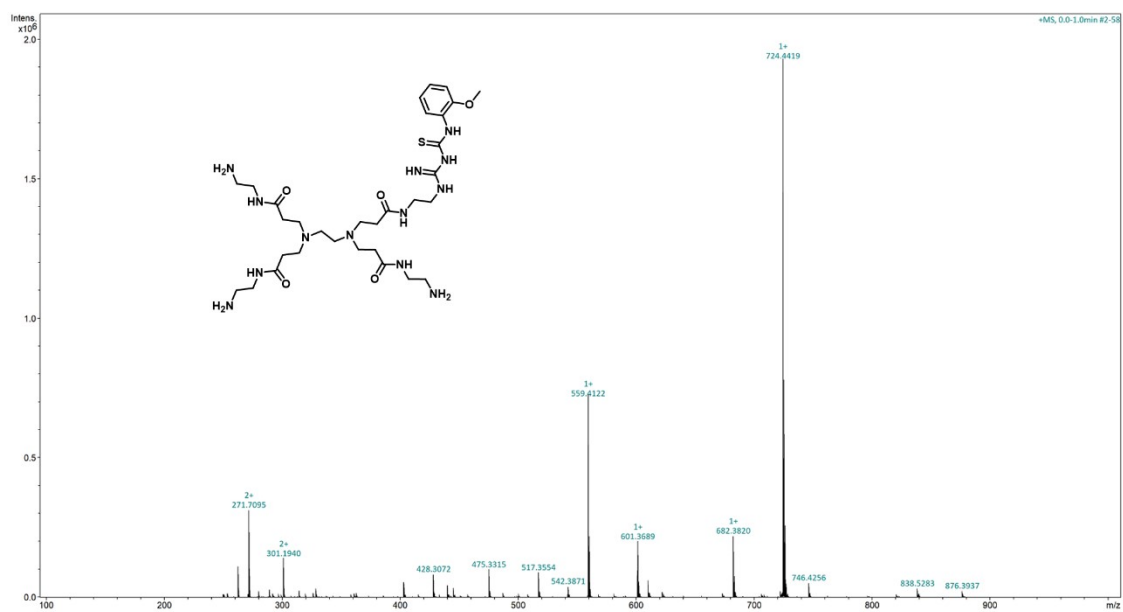

Figure S13: ESI-MS Spectrum of 3 calcd mass  $(M+H)^+$ , 724.4399; found, 746.4419

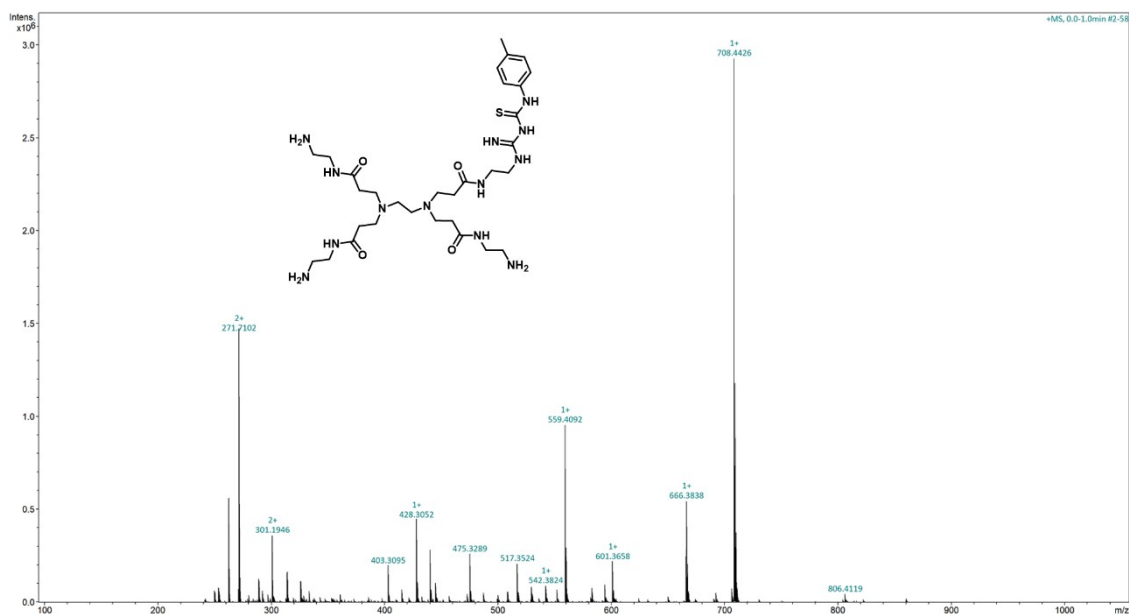

Figure S14: ESI-MS Spectrum of 6 calcd mass  $(M+H)^+$ , 708.4450; found, 708.4419

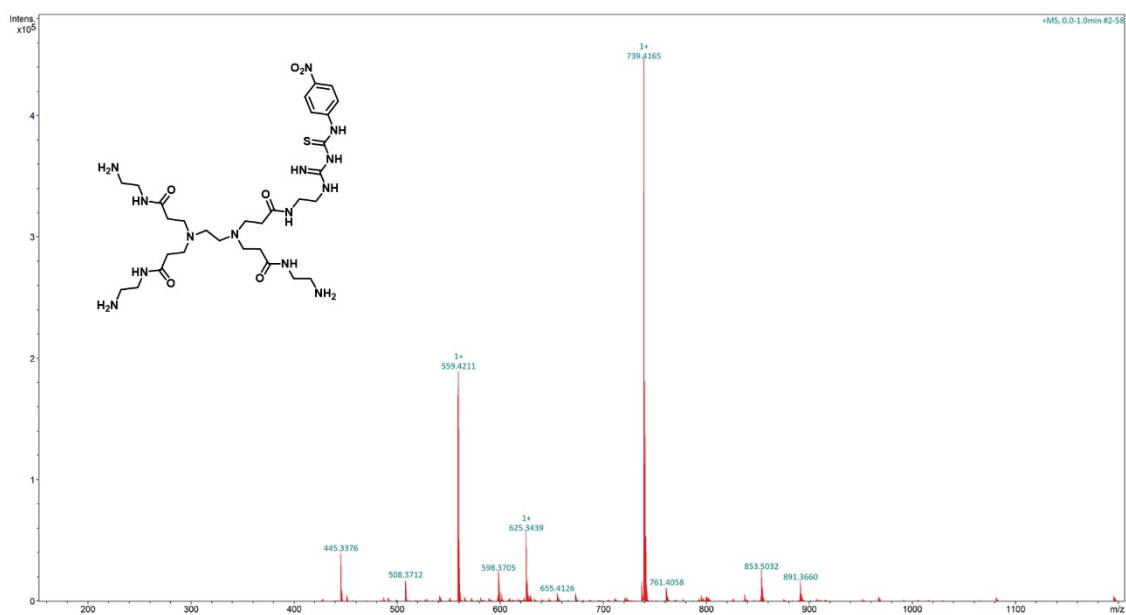

Figure S15: ESI-MS Spectrum of 7 calcd mass  $(M+H)^+$ , 739.4144; found, 739.4165
